# Supplementary material
Source: Springer Nature journal article supplement (https://www.springermedizin.de/resource/supplementary/12875_2011_632_MOESM1_ESM.pdf/9434828)

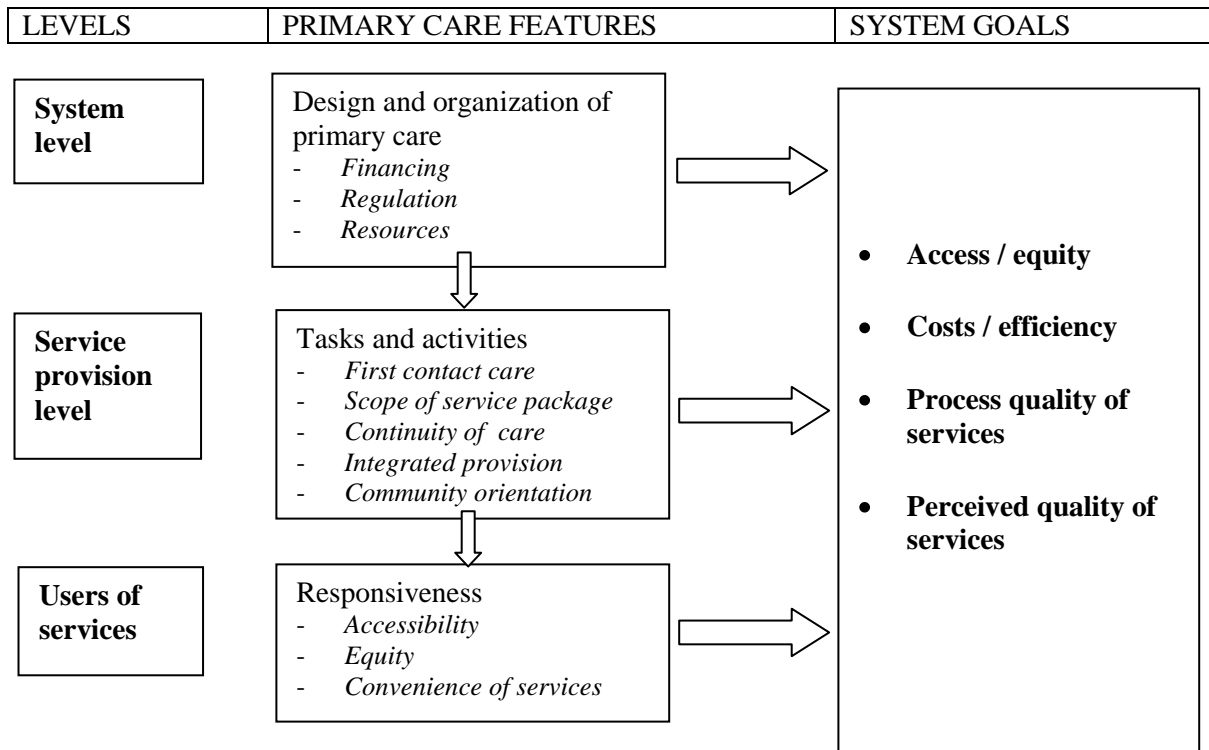

Supplement: MOESM1 [file 9434828]
